# Supplementary material for: Dynamics of soil properties and bacterial community structure by mulched fertigation system in semi-arid area of Northeast China
Source: PeerJ. 2022 Sep 22;10:e14044. doi: 10.7717/peerj.14044 (PMC9509672; doi:10.7717/peerj.14044)
Supplement: Table S3 [file peerj-10-14044-s007.xlsx]

## Sheet: Sheet1
Table S3 16S rRNA gene copy numbers×108 g-1 dry soil
	gene copy numbers
FP_BS_1	1.75
FP_BS_2	2.22
FP_BS_3	1.99
FP_BS_4	1.96
DI_BS_1	1.87
DI_BS_2	1.85
DI_BS_3	1.86
DI_BS_4	1.86
MF_BS_1	3.49
MF_BS_2	2.49
MF_BS_3	1.79
MF_BS_4	2.59
FP_V6_1	1.84
FP_V6_2	1.28
FP_V6_3	1.57
FP_V6_4	1.55
DI_V6_1	1.19
DI_V6_2	1.81
DI_V6_3	1.51
DI_V6_4	1.49
MF_V6_1	2.11
MF_V6_2	1.98
MF_V6_3	2.21
MF_V6_4	2.11
FP_VT_1	1.75
FP_VT_2	1.41
FP_VT_3	2.13
FP_VT_4	1.75
DI_VT_1	1.21
DI_VT_2	2.4
DI_VT_3	1.24
DI_VT_4	1.63
MF_VT_1	2.19
MF_VT_2	4.04
MF_VT_3	3.56
MF_VT_4	3.25
FP_R6_1	1.05
FP_R6_2	1.31
FP_R6_3	0.86
FP_R6_4	1.05
DI_R6_1	2.31
DI_R6_2	1.62
DI_R6_3	2.12
DI_R6_4	2
MF_R6_1	1.94
MF_R6_2	2.61
MF_R6_3	1.38
MF_R6_4	1.99
