# Supplementary material for: Dynamics of soil properties and bacterial community structure by mulched fertigation system in semi-arid area of Northeast China
Source: PeerJ. 2022 Sep 22;10:e14044. doi: 10.7717/peerj.14044 (PMC9509672; doi:10.7717/peerj.14044)
Supplement: Table S4 [file peerj-10-14044-s008.xlsx]

## Sheet: Sheet1
Table S4 Taxonomic composition of bacterial communities at the phylum level under three agricultural cropping patterns.
	Actinobacteria	Proteobacteria	Acidobacteria	Chloroflexi	Gemmatimonadetes	Planctomycetes	Bacteroidetes	Nitrospirae	Rokubacteria	Firmicutes	Others
FP_BS_1	0.293637	0.244819	0.191814	0.102308	0.0476767	0.0322804	0.0322112	0.00982597	0.00830364	0.00799225	0.0291319
FP_BS_2	0.267308	0.296786	0.189427	0.0978099	0.0394077	0.0340795	0.027229	0.00889181	0.0069197	0.00612393	0.0260181
FP_BS_3	0.271769	0.264577	0.18811	0.0981203	0.0417459	0.0401064	0.0316543	0.00869181	0.00854918	0.0059159	0.031661
FP_BS_4	0.262905	0.24206	0.21645	0.112746	0.0509434	0.0381554	0.0290315	0.0094032	0.0092575	0.00787736	0.0302703
DI_BS_1	0.233609	0.258797	0.215929	0.10639	0.0501332	0.0395115	0.0333875	0.0112099	0.0107947	0.00484379	0.0353942
DI_BS_2	0.299519	0.270906	0.164585	0.0943847	0.0433865	0.036363	0.0379199	0.0103449	0.00709269	0.00612393	0.0293741
DI_BS_3	0.271666	0.267724	0.199427	0.0963557	0.0452995	0.0372871	0.0288071	0.0111128	0.00868086	0.00559357	0.0333462
DI_BS_4	0.281598	0.252476	0.17998	0.112377	0.0502731	0.0337205	0.0280382	0.0135559	0.00752276	0.00512043	0.0300382
MF_BS_1	0.302841	0.266789	0.167595	0.101858	0.0415874	0.0332837	0.0326264	0.00996436	0.00671211	0.0068159	0.0299277
MF_BS_2	0.247621	0.261565	0.205653	0.106183	0.0504446	0.0353597	0.0327648	0.0114175	0.00944539	0.0046708	0.0348753
MF_BS_3	0.268067	0.238693	0.158667	0.101961	0.0434523	0.0314534	0.0336576	0.00919984	0.00809269	0.00719984	0.0345572
MF_BS_4	0.29951	0.282349	0.203972	0.116667	0.0438281	0.0346989	0.0303496	0.00886057	0.00675006	0.00756218	0.0304534
FP_V6_1	0.278414	0.255233	0.186313	0.106114	0.0453932	0.0440439	0.0203439	0.00899561	0.00941079	0.00781926	0.0379199
FP_V6_2	0.289589	0.25423	0.180224	0.107359	0.0467772	0.0374702	0.0216241	0.0113829	0.0100336	0.0067467	0.0345639
FP_V6_3	0.282844	0.280665	0.188494	0.120265	0.0462827	0.0439334	0.0276754	0.00880743	0.0122066	0.00646233	0.0419646
FP_V6_4	0.270282	0.236709	0.171677	0.0979127	0.042151	0.0391491	0.0218811	0.00919531	0.00788363	0.00674276	0.0368161
DI_V6_1	0.257897	0.270872	0.195032	0.101131	0.045324	0.0420026	0.0280594	0.0090994	0.00885721	0.00726568	0.0344601
DI_V6_2	0.294295	0.283742	0.173511	0.0827942	0.0377469	0.0354288	0.037228	0.0102757	0.00986057	0.0044632	0.0306543
DI_V6_3	0.298518	0.276063	0.186521	0.111962	0.0436912	0.0481678	0.0354255	0.00919561	0.00830028	0.00532058	0.0372347
DI_V6_4	0.256903	0.250226	0.171688	0.0852958	0.0395874	0.0445331	0.0322376	0.00925692	0.00767269	0.00541649	0.036783
MF_V6_1	0.277238	0.270664	0.188216	0.0969104	0.0522437	0.0290281	0.0240113	0.0143238	0.0124555	0.00591634	0.0289935
MF_V6_2	0.298343	0.253849	0.175172	0.0993322	0.0452548	0.0298239	0.023873	0.013182	0.00889181	0.00712729	0.045151
MF_V6_3	0.289698	0.258763	0.189466	0.118155	0.0523408	0.0328507	0.0189533	0.0147968	0.0128057	0.00627751	0.0415941
MF_V6_4	0.276426	0.247759	0.172285	0.0914658	0.0472798	0.0372343	0.0196125	0.0137009	0.0103176	0.00697371	0.0412462
FP_VT_1	0.236688	0.446978	0.118188	0.0701311	0.0359478	0.0178182	0.0291319	0.00830364	0.00422102	0.00477459	0.0278172
FP_VT_2	0.275093	0.275093	0.192714	0.0929661	0.0498564	0.0292011	0.0320036	0.0121787	0.00771546	0.00733488	0.0258451
FP_VT_3	0.279057	0.283607	0.178076	0.113242	0.0464033	0.02944	0.0258629	0.0126943	0.00879137	0.0088648	0.0327614
FP_VT_4	0.271613	0.295226	0.189659	0.0787797	0.0467358	0.0241531	0.0223328	0.00972553	0.00824262	0.00725809	0.0274746
DI_VT_1	0.266201	0.24814	0.207937	0.10812	0.0508944	0.0297201	0.0174376	0.014393	0.0144968	0.00781926	0.0348407
DI_VT_2	0.314396	0.211985	0.204339	0.0999896	0.0438363	0.0273674	0.0188216	0.0161229	0.0197903	0.00730028	0.0360516
DI_VT_3	0.335018	0.245963	0.211432	0.0897072	0.0478117	0.0261497	0.0199984	0.018749	0.0241017	0.0056362	0.0293328
DI_VT_4	0.291872	0.208696	0.194569	0.0966057	0.0461808	0.0250791	0.0175525	0.0150883	0.0141296	0.00558524	0.0307417
MF_VT_1	0.302391	0.241774	0.186382	0.111615	0.0511366	0.0259489	0.0198595	0.0122133	0.00992977	0.00750787	0.0312424
MF_VT_2	0.297236	0.24814	0.187939	0.0992631	0.0463274	0.0364322	0.017922	0.0121787	0.00986057	0.00736948	0.0373318
MF_VT_3	0.295519	0.24852	0.177455	0.0991213	0.0477046	0.0290906	0.0249835	0.0128057	0.00937795	0.00746992	0.0329893
MF_VT_4	0.303715	0.259478	0.197259	0.102	0.0457228	0.0278239	0.022255	0.0113325	0.00953588	0.00611575	0.0297262
FP_R6_1	0.286648	0.318444	0.159049	0.0816524	0.0452202	0.0232848	0.0329032	0.00826904	0.00664291	0.00954918	0.0283362
FP_R6_2	0.266858	0.294641	0.169117	0.0900945	0.0452202	0.0379891	0.0364322	0.00896101	0.00809605	0.00892641	0.0336643
FP_R6_3	0.27724	0.282669	0.165495	0.0892828	0.0449055	0.0401795	0.0390996	0.00890302	0.00814203	0.00921458	0.0339824
FP_R6_4	0.250249	0.311918	0.168554	0.0917365	0.043782	0.0359718	0.0374783	0.0088806	0.00802699	0.00963006	0.034661
DI_R6_1	0.272705	0.268553	0.192783	0.0908902	0.0487147	0.0333529	0.0303429	0.0135626	0.0067467	0.00633152	0.036017
DI_R6_2	0.260284	0.278103	0.193509	0.0946269	0.0545272	0.0309656	0.0230772	0.0157423	0.00871882	0.00858042	0.0318652
DI_R6_3	0.2595	0.271033	0.199481	0.0953366	0.0553475	0.0307994	0.0260459	0.0145124	0.00817663	0.00767813	0.0491856
DI_R6_4	0.25483	0.281896	0.189925	0.0869512	0.0488631	0.0343726	0.023822	0.0139391	0.00828072	0.00633426	0.0336893
MF_R6_1	0.23437	0.275958	0.211189	0.0977407	0.0599938	0.0306889	0.0265716	0.012663	0.00947998	0.00736948	0.0339757
MF_R6_2	0.253745	0.27876	0.196381	0.0953534	0.0564647	0.0305851	0.0245649	0.00996436	0.00958378	0.00733488	0.0372626
MF_R6_3	0.277167	0.280143	0.180087	0.0967965	0.0521879	0.0253049	0.0235861	0.0098653	0.00870364	0.00697371	0.0391967
MF_R6_4	0.268428	0.29162	0.169219	0.0926302	0.0615488	0.0341929	0.0209076	0.0105478	0.00872247	0.00669269	0.0354783
