# Supplementary material for: Dynamics of soil properties and bacterial community structure by mulched fertigation system in semi-arid area of Northeast China
Source: PeerJ. 2022 Sep 22;10:e14044. doi: 10.7717/peerj.14044 (PMC9509672; doi:10.7717/peerj.14044)
Supplement: Table S5 [file peerj-10-14044-s009.xlsx]

## Sheet: Sheet1
Table S5 The relative abundance of dominant bacterial genera under three agricultural cropping patterns.
	Nocardioides	Gaiella	Pseudarthrobacter	Solirubrobacter	Bradyrhizobium	Lysobacter	Nitrospira	Blastococcus	Ellin6067	Subgroup 10	Gemmatimonas	Acidibacter	Streptomyces	Microvirga	Rubrobacter	Rhodoplanes	Haliangium	Dongia	Steroidobacter	Nordella
FP_BS_1	0.0210013	0.0213473	0.0133896	0.0179566	0.0103795	0.0106217	0.00975677	0.00795765	0.0100682	0.00591634	0.00660831	0.00705809	0.00629692	0.00608933	0.00602014	0.00557036	0.00539736	0.00608933	0.00442861	0.00363284
FP_BS_2	0.0208283	0.0205861	0.00930699	0.0166073	0.0165035	0.0116597	0.00885721	0.00612393	0.0090648	0.00702349	0.0067813	0.0100682	0.00574335	0.00477459	0.00411722	0.00615853	0.0046362	0.00577795	0.00570875	0.00429021
FP_BS_3	0.0187988	0.0217937	0.00876101	0.0138934	0.0112133	0.00982261	0.00895721	0.00570116	0.00861123	0.0069977	0.00635853	0.00786845	0.00530116	0.004967	0.00587415	0.00637751	0.00545897	0.00460919	0.00583576	0.0042324
FP_BS_4	0.0194095	0.019909	0.0107525	0.0156191	0.0140321	0.00936801	0.00905707	0.00632758	0.00911473	0.00654184	0.00631605	0.00835823	0.00604714	0.00474364	0.0050705	0.00643546	0.00489751	0.00575882	0.00492437	0.00445182
DI_BS_1	0.0161229	0.0199287	0.00788845	0.0090994	0.0104833	0.0100682	0.0112099	0.00477459	0.00954918	0.00785386	0.00615853	0.0069197	0.00570875	0.00480919	0.00491298	0.00636612	0.00518977	0.00574335	0.00536277	0.00480919
DI_BS_2	0.0181642	0.0205515	0.0146352	0.018441	0.0146352	0.01896	0.0103449	0.00954918	0.009134	0.00529357	0.00747327	0.0090648	0.00951458	0.00653911	0.00819984	0.00550116	0.00394423	0.00543196	0.00563955	0.00370204
DI_BS_3	0.0197368	0.0237502	0.0129752	0.0171917	0.0118289	0.00978758	0.0127744	0.00642773	0.00967298	0.00647452	0.00571875	0.00717189	0.00708269	0.00517977	0.00545196	0.00662831	0.00641072	0.00641072	0.0068305	0.00503138
DI_BS_4	0.0173413	0.0207435	0.0117396	0.0147773	0.0121825	0.0128052	0.0117098	0.0066505	0.00942539	0.00658065	0.00643685	0.00770546	0.00744867	0.00552269	0.0061616	0.00613853	0.00516824	0.00584868	0.00597094	0.00454087
MF_BS_1	0.022662	0.0216932	0.0213473	0.0151195	0.0143584	0.0123517	0.00996436	0.00896101	0.00813064	0.00716189	0.00702349	0.0068159	0.00633152	0.00608933	0.00591634	0.00494758	0.00477459	0.00473999	0.00415182	0.00387503
MF_BS_2	0.0181988	0.0195481	0.014047	0.00892641	0.0111407	0.0111061	0.0113137	0.00761167	0.0090994	0.00716189	0.00754247	0.00792305	0.00567415	0.00470539	0.004567	0.00795765	0.00508598	0.00570875	0.00532817	0.00418642
MF_BS_3	0.0158427	0.0206937	0.0106609	0.0139086	0.0125363	0.0108132	0.00812213	0.00712059	0.0083132	0.00622397	0.00646701	0.00831573	0.00539146	0.00575618	0.00623197	0.00622452	0.00511305	0.00486328	0.0055317	0.00391658
MF_BS_4	0.0175679	0.0207784	0.0153917	0.0126515	0.0128475	0.0114451	0.00981141	0.00781443	0.00850166	0.00694652	0.00692261	0.00776103	0.00580692	0.00554599	0.00565838	0.00624246	0.00490898	0.00512415	0.00505543	0.00407567
FP_V6_1	0.0210013	0.0198249	0.0112099	0.0152925	0.00830364	0.00702349	0.00899561	0.00882261	0.00615853	0.00819984	0.00830364	0.00826904	0.00560495	0.00626233	0.00508598	0.00618239	0.00823444	0.00543196	0.00819984	0.00387503
FP_V6_2	0.0198595	0.0208283	0.0104487	0.0129744	0.0106563	0.00868422	0.0113829	0.00754247	0.00757707	0.0097378	0.00750787	0.00528977	0.00659391	0.0069197	0.00617585	0.00629692	0.00716189	0.00439401	0.0046362	0.00567415
FP_V6_3	0.018165	0.0192306	0.0116843	0.0139828	0.00851123	0.0137782	0.00839204	0.00614294	0.00817117	0.0107926	0.00769912	0.00859984	0.00619585	0.00572437	0.00679813	0.00629277	0.00615094	0.00438092	0.00626574	0.00494802
FP_V6_4	0.0194897	0.0197388	0.0110815	0.0140766	0.00915707	0.00889531	0.00947231	0.00747733	0.00729436	0.00886678	0.00772027	0.00671955	0.00600875	0.00563546	0.00597445	0.00609269	0.00691575	0.00530666	0.00677789	0.0036324
DI_V6_1	0.0159153	0.0195827	0.00992977	0.0108293	0.0152925	0.00671211	0.0090648	0.0069197	0.00878802	0.0090994	0.00671211	0.00664291	0.00667751	0.00602014	0.00508598	0.00636612	0.00584714	0.00560495	0.00297547	0.00411722
DI_V6_2	0.0205169	0.0162267	0.0370896	0.0158115	0.0147736	0.0122825	0.0102412	0.00719648	0.00754247	0.00629692	0.00574335	0.00750787	0.00778466	0.009134	0.0046016	0.00584714	0.00795765	0.00429021	0.004567	0.00422102
DI_V6_3	0.0189448	0.0183338	0.0252468	0.0128322	0.0121825	0.0110968	0.00809956	0.00771273	0.0062813	0.00926436	0.00846101	0.00597036	0.00681255	0.00653911	0.00471298	0.0054913	0.00692969	0.00569736	0.0042324	0.0041708
DI_V6_4	0.0179257	0.0167144	0.0200887	0.0130244	0.0142162	0.00985838	0.0103299	0.00649572	0.00820393	0.00915356	0.00763882	0.00617371	0.00575824	0.00723108	0.00506685	0.00513044	0.0060678	0.00479751	0.00432496	0.00483634
MF_V6_1	0.0165381	0.0202401	0.0157077	0.0117289	0.0122133	0.0119365	0.0142892	0.00612393	0.00823444	0.00612393	0.00612393	0.00619313	0.00633152	0.00698889	0.0069197	0.00515517	0.004567	0.00543196	0.00498218	0.00539736
MF_V6_2	0.0158807	0.0215549	0.0201709	0.0143238	0.00961838	0.00861502	0.0131474	0.00702349	0.00854583	0.00646992	0.00650452	0.00442861	0.00657371	0.00567415	0.010172	0.00608933	0.00664291	0.004567	0.00380583	0.00501678
MF_V6_3	0.0149432	0.0222502	0.0109217	0.0131356	0.0106449	0.00721167	0.0147584	0.00597036	0.00598598	0.00892378	0.00701619	0.00394944	0.00605813	0.00585358	0.0105187	0.0078096	0.0065197	0.00501552	0.00361139	0.00484632
MF_V6_4	0.014454	0.0226817	0.0152001	0.0138628	0.0104255	0.00978772	0.0135317	0.00583926	0.00638875	0.00759123	0.00674248	0.0042504	0.00599368	0.00574845	0.00929469	0.00673329	0.0064432	0.00519104	0.00346977	0.004576
FP_VT_1	0.0229388	0.0198249	0.0102757	0.014047	0.0109677	0.0102412	0.00826904	0.0126284	0.0022143	0.00819984	0.00512058	0.00415182	0.00422102	0.0092032	0.0046708	0.0044632	0.00152233	0.00169533	0.00439401	0.00314846
FP_VT_2	0.0208975	0.0208283	0.0125247	0.0118327	0.0126976	0.0169533	0.0121787	0.0109331	0.00671211	0.00892378	0.00553576	0.00595094	0.00640072	0.00882261	0.00567415	0.00775006	0.00370204	0.00318306	0.00653911	0.00470539
FP_VT_3	0.0210794	0.0196064	0.0121871	0.0109791	0.0121698	0.0141245	0.0121625	0.00896842	0.00717501	0.0107601	0.00498092	0.00677155	0.00638851	0.00851882	0.00758885	0.00670581	0.00365226	0.00272835	0.00673349	0.00402556
FP_VT_4	0.0212576	0.019363	0.0125739	0.0107026	0.0126489	0.00993303	0.0101535	0.0104644	0.00613388	0.00971327	0.00498344	0.00688332	0.0063322	0.00911488	0.00637741	0.00677607	0.00242554	0.00194245	0.00669072	0.00426654
DI_VT_1	0.0125938	0.0195827	0.00743867	0.00958378	0.0103795	0.00941079	0.0141854	0.00577795	0.00799225	0.0090994	0.00477459	0.00512058	0.00629692	0.00418642	0.00885721	0.00515517	0.00591634	0.00415182	0.00747327	0.00487839
DI_VT_2	0.012836	0.0162267	0.00875342	0.0121787	0.0106217	0.00750787	0.0160883	0.00532817	0.00577795	0.00629692	0.00259489	0.0044978	0.00487839	0.00501678	0.0123517	0.00377123	0.00404802	0.00377123	0.00546656	0.00605473
DI_VT_3	0.0130424	0.0176334	0.0090134	0.0123632	0.012339	0.00858918	0.0171714	0.00561742	0.00531282	0.00991644	0.00371712	0.00419518	0.00398096	0.00658505	0.0123113	0.00437054	0.00324523	0.0042048	0.00468092	0.0042821
DI_VT_4	0.0133332	0.0174149	0.00856263	0.0130667	0.0125143	0.00890612	0.016539	0.00565016	0.00638147	0.00850149	0.00376768	0.0045467	0.00495698	0.00561668	0.0122421	0.00487879	0.00441257	0.00383358	0.00604461	0.00499029
MF_VT_1	0.0173338	0.0202401	0.0203093	0.0116943	0.0116251	0.0120749	0.0121787	0.00813064	0.00671211	0.00612393	0.00723108	0.00577795	0.00626233	0.00788845	0.00543196	0.00719648	0.00339065	0.00418642	0.00664291	0.0044632
MF_VT_2	0.0156039	0.0215549	0.0114867	0.0135972	0.0111061	0.0111061	0.0121441	0.0092032	0.00660831	0.00646992	0.00650452	0.00619313	0.00740408	0.00740408	0.00813064	0.00778466	0.00352905	0.00297547	0.00646992	0.00557036
MF_VT_3	0.0166434	0.025325	0.0181579	0.0121732	0.0136805	0.0145358	0.0122006	0.0095307	0.00631585	0.00902378	0.00579163	0.00657813	0.00657121	0.0086961	0.00771501	0.00542666	0.00315831	0.00385058	0.00657045	0.00463016
MF_VT_4	0.0162482	0.0196069	0.0172132	0.0132336	0.012303	0.0123357	0.0119146	0.00865657	0.00633566	0.00749123	0.00667535	0.00645397	0.00693373	0.00834942	0.00713928	0.00685581	0.00339234	0.00361116	0.00647318	0.00484982
FP_R6_1	0.0230426	0.0130436	0.0117289	0.00785386	0.00996436	0.00775006	0.00819984	0.00743867	0.00781926	0.00619313	0.00833823	0.00425561	0.00377123	0.00342525	0.00408262	0.00415182	0.00425561	0.00345985	0.00377123	0.00339065
FP_R6_2	0.0236654	0.0159153	0.00958378	0.0115213	0.0101374	0.00768086	0.00896101	0.00885721	0.00830364	0.00633152	0.00629692	0.00785386	0.0044978	0.00404802	0.0045324	0.00408262	0.00574335	0.00287167	0.0044978	0.00325226
FP_R6_3	0.0197444	0.0157154	0.0125905	0.0098626	0.00985952	0.0105837	0.00907302	0.00756079	0.00746041	0.00676467	0.00663775	0.00610201	0.0038975	0.00458324	0.00408134	0.00533974	0.00603893	0.00348058	0.0038075	0.00296409
FP_R6_4	0.0217507	0.0141431	0.0117207	0.00969708	0.0100346	0.00867611	0.00868753	0.00788167	0.00778599	0.00640582	0.00714398	0.00596132	0.00402555	0.00395105	0.00414156	0.00460156	0.00541317	0.00370437	0.00411555	0.00317138
DI_R6_1	0.0190292	0.0188216	0.0108639	0.0147044	0.0114521	0.0123863	0.0135626	0.00958378	0.0092032	0.00878802	0.00802685	0.00982597	0.00390963	0.00470539	0.00512058	0.00608933	0.00640072	0.00553576	0.00390963	0.00480919
DI_R6_2	0.0174722	0.0193406	0.00833823	0.0121787	0.0122479	0.0102412	0.0156385	0.00813064	0.0134588	0.00598554	0.00875342	0.00947998	0.00484379	0.00425561	0.00539736	0.00660831	0.00619313	0.00636612	0.00484379	0.00470539
DI_R6_3	0.0216243	0.019686	0.0124836	0.0126144	0.0106103	0.0118487	0.0135943	0.0084842	0.0124628	0.00758885	0.00857534	0.0102553	0.00483784	0.00560547	0.00463248	0.00638159	0.00671965	0.00575358	0.00458784	0.00503282
DI_R6_4	0.0188674	0.0195141	0.0110318	0.0125387	0.0107601	0.0110094	0.0147303	0.00867665	0.0119291	0.00785361	0.0086893	0.0102501	0.00458448	0.00545451	0.00463991	0.00693883	0.00707361	0.00559473	0.00483448	0.00524293
MF_R6_1	0.0121441	0.0189254	0.00660831	0.009134	0.00927239	0.0114175	0.012663	0.00470539	0.0134934	0.00664291	0.00802685	0.0090302	0.00667751	0.00498218	0.00536277	0.00947998	0.00560495	0.00574335	0.00667751	0.00508598
MF_R6_2	0.0148082	0.0188908	0.00937619	0.0134242	0.0113137	0.009134	0.00996436	0.00698889	0.0105179	0.00615853	0.00854583	0.00837283	0.00595094	0.00390963	0.00588174	0.00664291	0.00768086	0.00643532	0.00595094	0.00498218
MF_R6_3	0.0189064	0.0206275	0.00858918	0.0191017	0.0150673	0.0170541	0.00958146	0.00772847	0.00689543	0.00657391	0.00932762	0.00546362	0.00435636	0.0054259	0.0121279	0.00701581	0.00715273	0.00546742	0.00353636	0.00431594
MF_R6_4	0.0154961	0.0190109	0.00859473	0.01522	0.0126922	0.0131849	0.0106471	0.00654918	0.0103807	0.00641205	0.00869819	0.00651899	0.00460464	0.00455	0.00665907	0.00776928	0.00677893	0.00615768	0.00542464	0.00485266
