# Supplementary material for: Dynamics of soil properties and bacterial community structure by mulched fertigation system in semi-arid area of Northeast China
Source: PeerJ. 2022 Sep 22;10:e14044. doi: 10.7717/peerj.14044 (PMC9509672; doi:10.7717/peerj.14044)
Supplement: Table S6 [file peerj-10-14044-s010.xlsx]

## Sheet: Sheet1
Table S6 Shannon index and Chao index of bacterial communities for three agricultural cropping patterns at BS, V6, VT and R6.
	Chao1	Shannon
FP_BS_1	4267	7.02
FP_BS_2	4247	7.05
FP_BS_3	4881	6.98
FP_BS_4	4299	7
DI_BS_1	4950	7.03
DI_BS_2	4895	7.05
DI_BS_3	4980	7
DI_BS_4	5026	7.04
MF_BS_1	5021	7.09
MF_BS_2	5013	7.07
MF_BS_3	5229	7.1
MF_BS_4	5036	7.08
FP_V6_1	4952	7.07
FP_V6_2	4932	7.08
FP_V6_3	4949	7
FP_V6_4	5039	7.09
DI_V6_1	5079	7.05
DI_V6_2	5185	7.11
DI_V6_3	5066	7.06
DI_V6_4	5037	7.04
MF_V6_1	5211	7.08
MF_V6_2	5237	7.09
MF_V6_3	5205	7.07
MF_V6_4	5209	7.13
FP_VT_1	4623	6.95
FP_VT_2	4559	6.96
FP_VT_3	4687	6.94
FP_VT_4	4607	6.96
DI_VT_1	4831	6.98
DI_VT_2	4758	7
DI_VT_3	4885	6.98
DI_VT_4	4842	6.97
MF_VT_1	4845	6.99
MF_VT_2	5067	7
MF_VT_3	4862	6.98
MF_VT_4	4834	6.99
FP_R6_1	4175	7.02
FP_R6_2	4198	7
FP_R6_3	4113	7.02
FP_R6_4	4182	7.03
DI_R6_1	4611	7.01
DI_R6_2	4624	7.03
DI_R6_3	4822	7.02
DI_R6_4	4528	6.99
MF_R6_1	4924	7.05
MF_R6_2	4748	7.06
MF_R6_3	4993	7.06
MF_R6_4	5004	7.08
