# Supplementary material for: Dynamics of soil properties and bacterial community structure by mulched fertigation system in semi-arid area of Northeast China
Source: PeerJ. 2022 Sep 22;10:e14044. doi: 10.7717/peerj.14044 (PMC9509672; doi:10.7717/peerj.14044)
Supplement: Table S7 [file peerj-10-14044-s011.xlsx]

## Sheet: Sheet1
Table S7 Soil chemical properties under three agricultural cropping patterns.
	SOC (g/kg)	pH	Moisture （%）	Available N (mg/kg)	NO3−-N (mg/kg)	NH4+-N (mg/kg)	Available P (mg/kg)	Available K (mg/kg)
FP_BS_1	13.95	6.83	0.133554	528.472	11.3251	1.03	26.88	185.068
FP_BS_2	13.91	6.83	0.137277	478.91	11.3513	0.95	25.66	186.31
FP_BS_3	13.91	6.81	0.137495	472.32	9.9352	0.91	27.34	181.814
FP_BS_4	13.9233	6.82333	0.136375	479.901	10.4705	0.936667	27.96	183.064
DI_BS_1	12.9004	6.77	0.146269	465.3	15.1043	0.94	20.8678	154.5
DI_BS_2	13.19	6.76	0.147689	460.94	10.4715	0.98	20.8694	162.444
DI_BS_3	13.11	6.75	0.150723	451.273	18.0501	0.91	19.8588	142.856
DI_BS_4	13.0401	6.76	0.148493	468.504	15.8753	0.956667	19.732	150.6
MF_BS_1	13.3132	6.75	0.143498	447.359	7.14413	0.75	18.48	144.776
MF_BS_2	13.2402	6.77	0.140187	475.037	7.00109	0.64	18.68	142.231
MF_BS_3	13.12	6.77	0.146954	437.984	9.3267	0.83	21.48	138.361
MF_BS_4	13.1978	6.75	0.146213	440.127	7.55731	0.806667	20.88	140.456
FP_V6_1	13.76	6.93	0.171845	380.18	10.298	0.71	21.36	161.969
FP_V6_2	13.74	6.93	0.17765	396.184	11.3542	1.15	22.16	172.317
FP_V6_3	13.68	6.91	0.1782	379.505	8.81452	0.72	23.6056	148.314
FP_V6_4	13.7	6.92333	0.175632	371.956	8.82225	0.94	22.7752	158.2
DI_V6_1	11.6	6.94	0.216603	348.53	5.29744	0.82	21.66	157.084
DI_V6_2	11.63	6.94	0.196835	322.241	6.06974	0.87	20.72	153.619
DI_V6_3	11.59	6.92	0.163	311.031	4.46678	0.89	22.82	162.155
DI_V6_4	11.6067	6.93333	0.188146	324.6	5.01132	0.86	20.8	156.286
MF_V6_1	12.2921	6.95	0.184794	303.189	3.42931	0.94	17.52	143.5
MF_V6_2	12.4705	6.95	0.183565	314.337	5.2654	0.75	17.36	138.874
MF_V6_3	12.48	6.97	0.183211	319.882	5.16764	0.72	20.8296	147.326
MF_V6_4	12.3875	6.95667	0.18519	313.802	4.75412	0.816667	19.9032	141.9
FP_VT_1	12.88	6.34	0.151951	369.501	11.71	1.07	27.2	197.4
FP_VT_2	13.13	6.38	0.151659	336.272	11.1262	1.17	25.28	211.649
FP_VT_3	12.89	6.37	0.156556	345.91	10.9319	1.05	27.3694	224.851
FP_VT_4	12.94	6.33667	0.152055	359.895	9.9227	1.07	27.9498	210.9
DI_VT_1	12.27	6.64	0.141252	350.664	10.2009	0.92	18.908	154.1
DI_VT_2	12.36	6.67	0.135688	356.747	9.14022	0.87	22.657	186.801
DI_VT_3	12.37	6.61	0.144393	344.665	8.98036	0.86	24.727	137.799
DI_VT_4	12.3067	6.62667	0.139111	337.359	8.90716	0.883333	20.764	158.9
MF_VT_1	11.585	6.88	0.155425	334.904	6.43241	0.81	15.5098	144.632
MF_VT_2	11.4166	6.88	0.155593	338.135	9.57751	0.73	16.02	140.79
MF_VT_3	11.26	6.91	0.16229	321.369	7.49803	0.81	14.0996	119.978
MF_VT_4	11.3939	6.87667	0.156436	334.136	8.23598	0.77	16.4098	121.8
FP_R6_1	15.65	7.16	0.106604	408.25	10.7508	1.07	27.8332	166.6
FP_R6_2	15.68	7.16	0.108014	371.65	9.72626	0.99	29.7978	171.394
FP_R6_3	15.67	7.14	0.108518	411.789	10.3435	0.94	20.0464	153.506
FP_R6_4	15.6667	7.14	0.107979	402.563	10.6735	0.96	27.2258	162.5
DI_R6_1	13.8	7.08	0.117831	343.207	5.88889	0.93	23.5468	142.1
DI_R6_2	14.5	7.01	0.117698	342.11	5.65566	0.98	23.66	141.73
DI_R6_3	14.65	7.02	0.11099	331.001	7.03475	0.88	22.6978	136.97
DI_R6_4	14.25	7.05	0.114173	345.439	6.32644	0.916667	23.5682	139.2
MF_R6_1	12.8064	6.85	0.136811	319.681	6.10591	0.76	21.94	158.018
MF_R6_2	12.79	6.85	0.135331	314.145	6.88912	0.83	22.14	127.43
MF_R6_3	12.941	6.87	0.137847	326.913	7.3519	0.81	19.895	129.952
MF_R6_4	12.8445	6.85667	0.139329	306.913	7.18231	0.773333	20.925	135.8
